# Supplementary material
Source: Springer Nature journal article supplement (https://www.springermedizin.de/resource/supplementary/12985_2010_1050_MOESM2_ESM.pdf/9609034)

**A.**

|           |          |          |          |           |          |          |          |          |          |          |          |          |           |          |          |          |          |          |          |          |          |          |          |          |          |          |          |        |        |           |          |       |   |
|-----------|----------|----------|----------|-----------|----------|----------|----------|----------|----------|----------|----------|----------|-----------|----------|----------|----------|----------|----------|----------|----------|----------|----------|----------|----------|----------|----------|----------|--------|--------|-----------|----------|-------|---|
|           | G543-3   | G548-1   | G583-1   | G598-2    | G610-3   | G645-2   | G652-3   | G676-A   | G692-1   | G693-1   | G706-1   | G753-1   | G755-1    | G756-1   | G762-1   | G765-1   | G771-1   | G784-1   | G787-1   | G793-1   | G795-1   | G802-1   | G803-1   | G803-2   | G804-1   | G806-1   | G808-1   | BOM011 | BOM019 | 293T ctrl | 293T/GPC | L VLP |   |
| Trad Ag   | +        | +        | +        |           | -        | -        | -        | -        | +        | -        | +        | +        | -         | +        | +        | +        | +        | +        | -        | -        | +        | +        | -        | -        | -        | -        | +        |        |        |           |          |       |   |
| Trad IgG  |          |          |          |           |          |          |          |          |          |          |          |          |           |          |          |          |          |          |          |          |          |          |          |          |          |          |          |        |        |           |          |       |   |
| Trad IgM  | +        | -        | -        | -         | +        | -        | +        |          | -        | -        | -        | -        | -         | -        | -        | -        | -        | -        | -        | -        | -        | -        | +        | -        | -        | -        | -        |        |        |           |          |       |   |
| r Ag (NP) |          |          | +        | -         | -        | -        | ±        |          | +        | -        | +        | +        | -         | ±        | +        | +        | +        | +        | -        | -        | -        | -        | ±        | ±        |          | -        | +        | -      | -      |           |          |       |   |
| r IgG     |          |          |          |           |          |          | +        |          | +        | ±        | ±        | ±        | +         | +        | +        | +        | ±        | ±        | ±        | +        | +        | +        | +        | +        | +        | +        | +        | +      |        |           |          |       |   |
| r IgM     |          |          | ±        | +         |          | +        | +        |          | +        | -        | ±        | ±        | +         | ±        | -        | +        | -        | +        | +        | +        | +        | +        | +        | ±        | ±        | ±        | ±        | -      | -      |           |          |       |   |
| GP1 WB    | -        | -        | +        | -         | +        | -        | -        | +        | +        | -        | -        | -        | +         | -        | +        | +        | -        | -        | -        | -        | -        | -        | -        | -        | -        | -        | -        | -      | -      | -         | -        | +     | + |
| GP2 WB    | -        | -        | -        | -         | -        | -        | -        | -        | +        | -        | -        | -        | -         | -        | +        | +        | -        | -        | -        | -        | -        | -        | -        | -        | -        | -        | -        | -      | -      | -         | -        | +     | + |
| NP WB     | -        | -        | -        | -         | -        | -        | -        | -        | +        | -        | -        | -        | -         | -        | +        | +        | -        | -        | ±        | -        | -        | -        | -        | -        | -        | -        | -        | -      | -      | -         | -        | +     | + |
| outcome   | <b>d</b> | <b>E</b> | <b>d</b> | <b>na</b> | <b>d</b> | <b>d</b> | <b>d</b> | <b>c</b> | <b>E</b> | <b>E</b> | <b>d</b> | <b>d</b> | <b>na</b> | <b>d</b> | <b>E</b> | <b>?</b> | <b>E</b> | <b>E</b> | <b>?</b> | <b>d</b> | <b>?</b> | <b>d</b> | <b>d</b> | <b>d</b> | <b>d</b> | <b>E</b> | <b>d</b> |        |        |           |          |       |   |

**B.**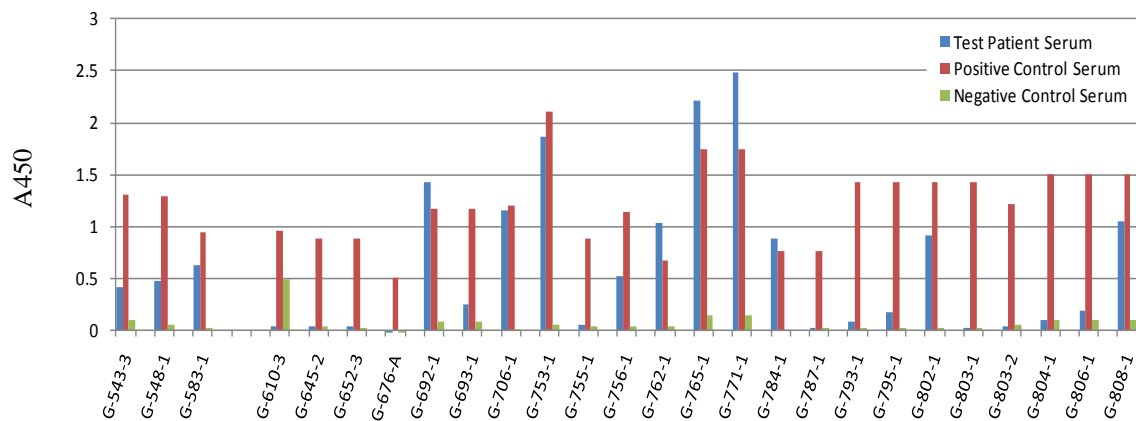**C.**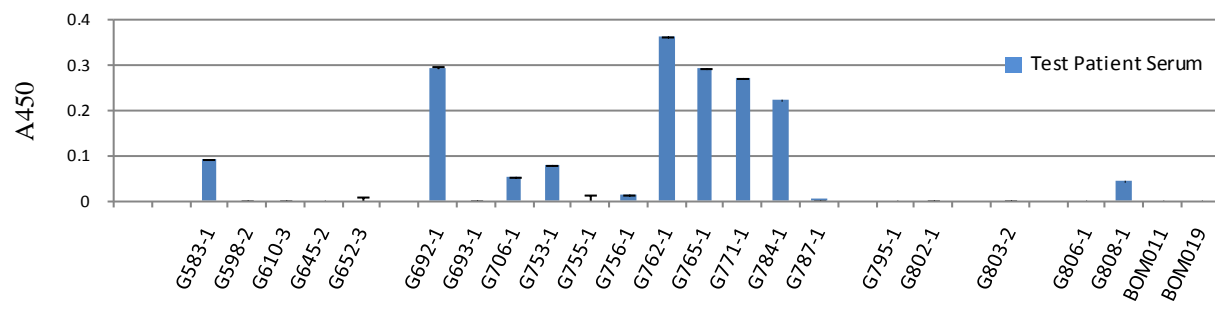

Supplement: MOESM2 [file 9609034]
